# Supplementary material for: Towards in vivo g-ratio mapping using MRI: Unifying myelin and diffusion imaging
Source: PubMed Central journal article supplement (PMC7840525; doi:10.1016/j.jneumeth.2020.108990), 2021-01-15
Supplement: mmc1.pdf [file mmc1.pdf]

Figure S1:

(a) Fitting (line) West et al. 2018 data using the heuristic Eq. (S1)

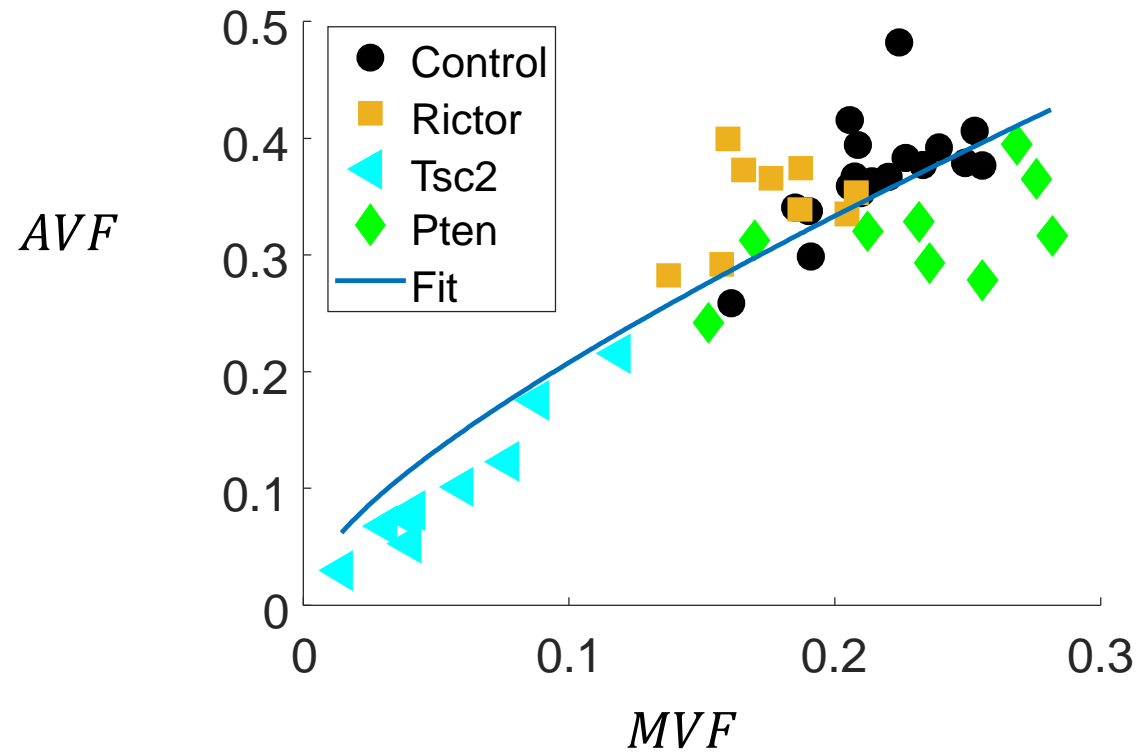

(b) G-ratio calculated from fitted data

(using (S2)  $g_{GT} = \sqrt{1 - \frac{MVF_{GT}}{MVF_{GT} + AVF_{GT}}}$ )

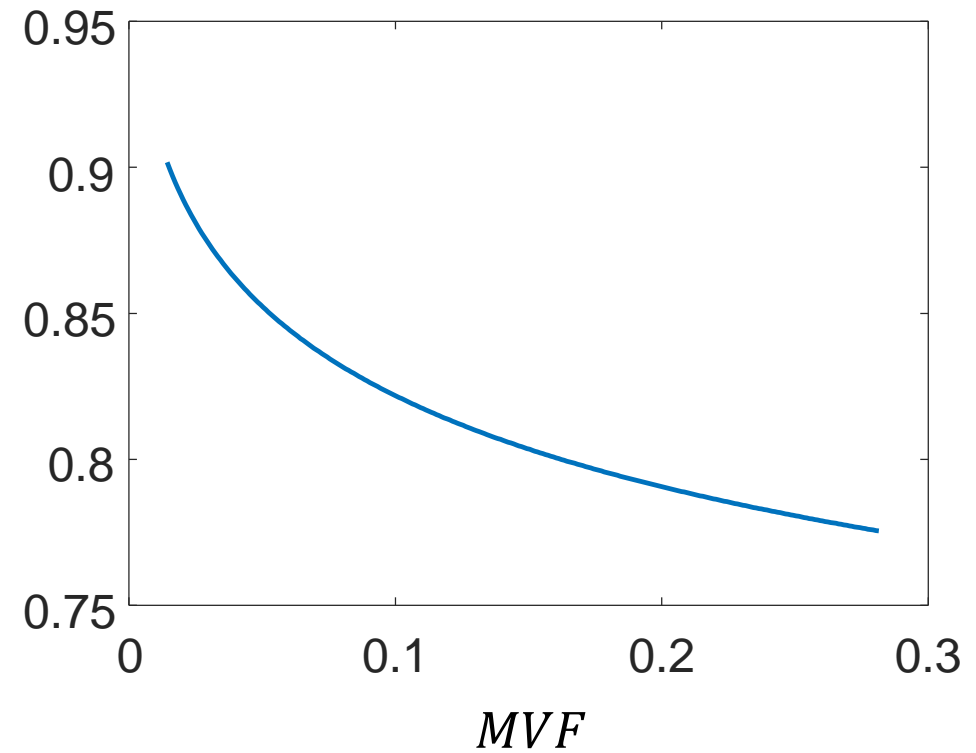

Heuristic equation: (S1)  $AVF_{GT} = 0.002 + 0.741 MVF_{GT} + 0.434 \ln(MVF_{GT})$
